# Supplementary material for: Electric-field control of skyrmions in multiferroic heterostructure via magnetoelectric coupling
Source: PubMed Central journal article supplement (PMC7803786; doi:10.1038/s41467-020-20528-y), 2021-01-12
Supplement: 41467_2020_20528_MOESM1_ESM.pdf [file 41467_2020_20528_MOESM1_ESM.pdf]

1  
2  
3  
4  
5  
6  
7  
8  
9  
10  
11  
12  
13  
14  
15  
16  
17  
18  
19  
20  
21  
22

**Electric-field control of skyrmions  
in multiferroic heterostructure via magnetoelectric coupling**

You Ba<sup>1,2†</sup>, Shihao Zhuang<sup>3†</sup>, Yike Zhang<sup>1,2†</sup>, Yutong Wang<sup>1,2</sup>, Yang Gao<sup>4</sup>, Hengan Zhou<sup>1,2</sup>, Mingfeng Chen<sup>5</sup>, Weideng Sun<sup>1,2</sup>, Quan Liu<sup>1,2</sup>, Guozhi Chai<sup>4</sup>, Jing Ma<sup>5</sup>, Ying Zhang<sup>6</sup>, Huanfang Tian<sup>6</sup>, Haifeng Du<sup>7</sup>, Wanjun Jiang<sup>1,2</sup>, Cewen Nan<sup>5</sup>, Jia-Mian Hu<sup>3\*</sup> and Yonggang Zhao<sup>1,2\*</sup>

<sup>1</sup>Department of Physics and State Key Laboratory of Low-Dimensional Quantum Physics, Tsinghua University, Beijing 100084, China

<sup>2</sup>Frontier Science Center for Quantum Information, Tsinghua University, Beijing 100084, China

<sup>3</sup>Department of Materials Science and Engineering, University of Wisconsin-Madison, WI 53706, Madison

<sup>4</sup>Key Laboratory for Magnetism and Magnetic Materials of the Ministry of Education, Lanzhou University, Lanzhou 730000, China

<sup>5</sup>School of Materials Science and Engineering and State Key Lab of New Ceramics and Fine Processing, Tsinghua University, Beijing 100084, China

<sup>6</sup>Beijing National Laboratory for Condensed Matter Physics, Institute of Physics, Chinese Academy of Sciences, Beijing 100190, China

<sup>7</sup>Anhui Province Key Laboratory of Condensed Matter Physics at Extreme Conditions, High Magnetic Field Laboratory of Chinese Academy of Sciences, China

<sup>†</sup>These authors contributed equally to this work.

\*Corresponding author. E-mail: ygzhao@tsinghua.edu.cn; jhu238@wisc.edu

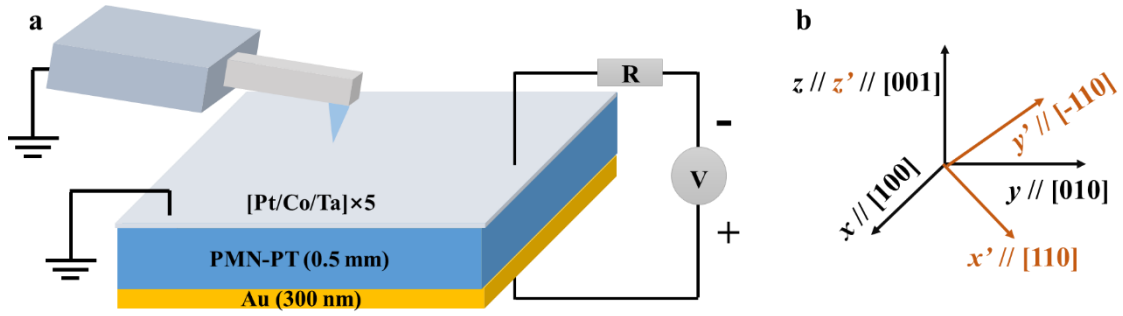

23

24 **Supplementary Fig. 1 | Schematic of the sample configuration.** **a**, Schematic of the  
 25 sample stack structure and set up for MFM measurement with *in situ* electric fields. **b**,  
 26 Coordinate systems defined for experiment (black) and simulations (brown).

27

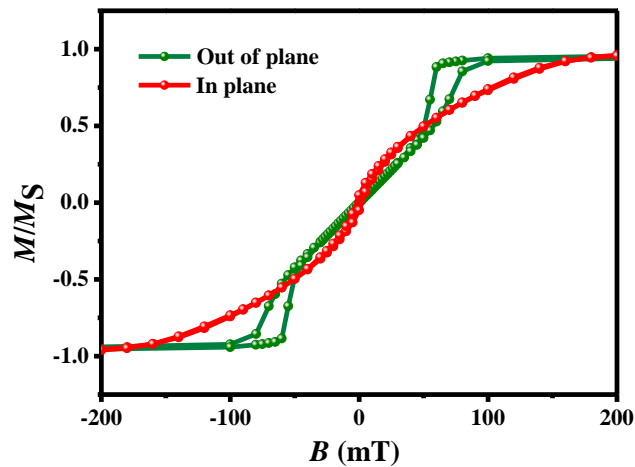

28

29 **Supplementary Fig. 2 | Magnetic hysteresis loops.** Normalized out-of-plane (olive)  
 30 and in-plane (red) magnetic hysteresis loops of the sample.

31 Several magnetic parameters can be obtained from the hysteresis loop: saturation  
 32 magnetization,  $M_s = 9.48 \times 10^5$  A/m, the effective magnetic anisotropy field,  $\mu_0 H_K = 180$   
 33 mT ( $\mu_0$  is the vacuum permeability), defined as the crossing point of the out-of-plane  
 34 and in-plane magnetic hysteresis loops. Therefore, the uniaxial magnetic anisotropy

35 constant is  $K_U = \frac{1}{2} \mu_0 \mathbf{H}_K \cdot \mathbf{M}_s + \frac{1}{2} \mu_0 \mathbf{M}_s^2 = 6.5 \times 10^5$  J/m<sup>3</sup>.

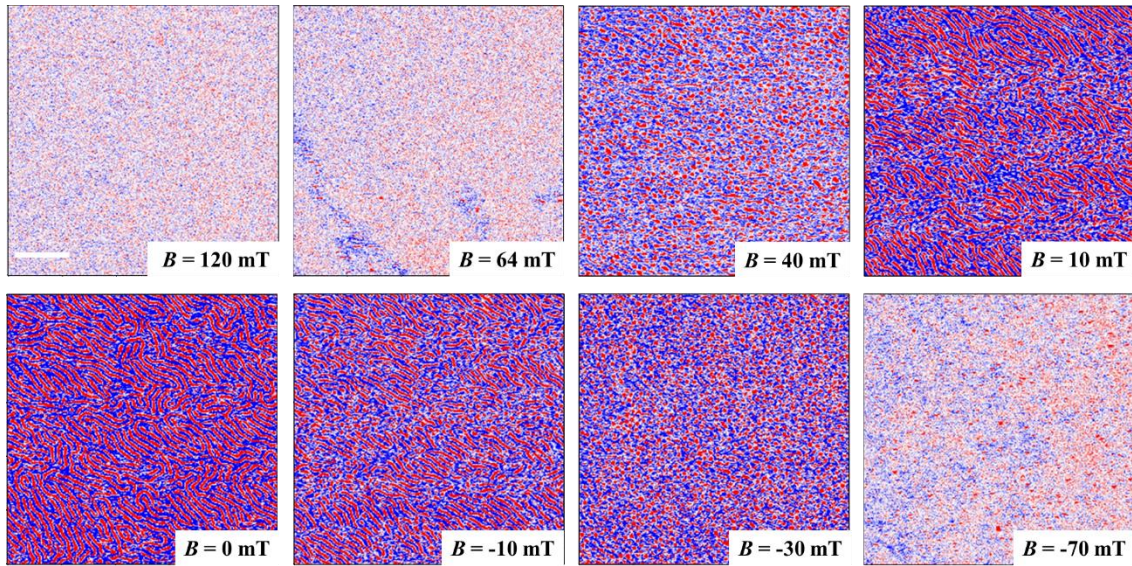

36

37 **Supplementary Fig. 3** | MFM observation of evolutions of the magnetic domain by  
 38 varying magnetic field from the positive saturation field to the negative one along the  
 39 perpendicular direction. The scale bar is 2  $\mu\text{m}$ .

40 Initially, the ferromagnetic saturation state was observed in the MFM image  
 41 without contrast at 120 mT, larger than the out-of-plane saturation field (100 mT). Then,  
 42 skyrmions appear gradually when reducing magnetic field to 64 mT, and an entire  
 43 skyrmion state is reached at 40 mT. After that, the skyrmions begin to merge together  
 44 and transform to stripe domains and labyrinth domains at 0 mT. Continue to increase  
 45 magnetic field in the opposite direction, skyrmions reappear from the labyrinth domains,  
 46 and reach the maximum skyrmion density and then change to magnetization saturation  
 47 state, similar to the decreasing magnetic field process.

48

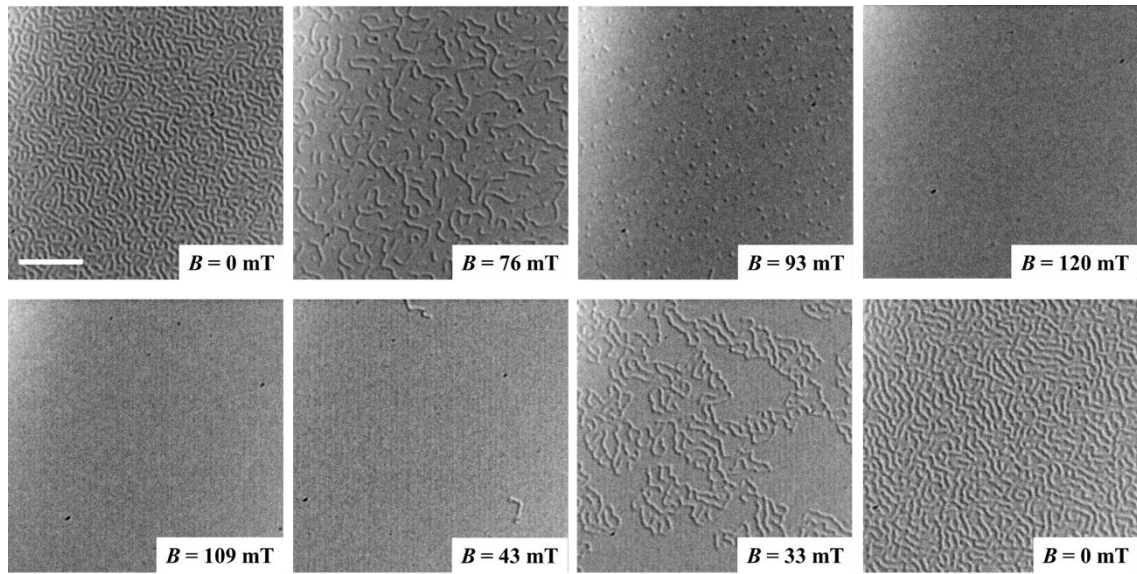

49

50 **Supplementary Fig. 4** | L-TEM observation of evolutions of the magnetic domain by  
 51 increasing and decreasing the perpendicular magnetic fields. The scale bar is 2  $\mu\text{m}$ .

52 When increasing magnetic field, the maximum skyrmion density was obtained at  
 53 93 mT, and no skyrmion appears when decreasing magnetic field, which is different  
 54 from the skyrmion evolutions characterized by MFM. The difference is likely attributed  
 55 to the different magnetic properties in different substrates used in the two  
 56 characterizations.

57

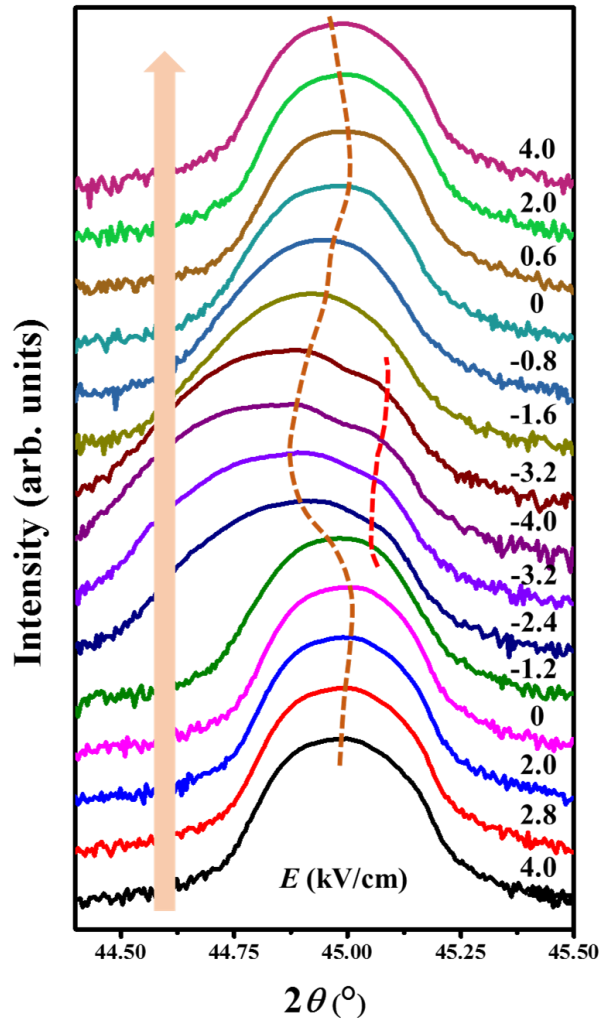

58

59 **Supplementary Fig. 5 | XRD data of the (002) peak of PMN-PT(001) substrate**  
 60 **under different electric fields.**

61 The (002) diffraction peak of PMN-PT(001) FE single crystal moves to the left  
 62 side slightly under positive electric fields, and has an obvious shift after applying  
 63 negative electric fields. Meanwhile, it shows prominent broadening and splitting after  
 64 -1.2 kV/cm, which hints a ferroelectric phase transformation in our sample<sup>1</sup>. Generally,  
 65 PMN-PT(001) single crystal near the morphotropic phase boundary (MPB) has rich  
 66 ferroelectric phases, and is more likely to transform between the different ferroelectric  
 67 phases under electric field<sup>1</sup>. Such characteristic is the main cause for the large  
 68 piezoelectric effect<sup>2</sup>, and may also explain the exotic strain behavior in our sample.

69 Nevertheless, the discussion of the detailed ferroelectric phase transformation is beyond  
 70 our scope, thus in the following, we focus on the influence of the strain on the skyrmions,  
 71 without further exploring the strain origin.

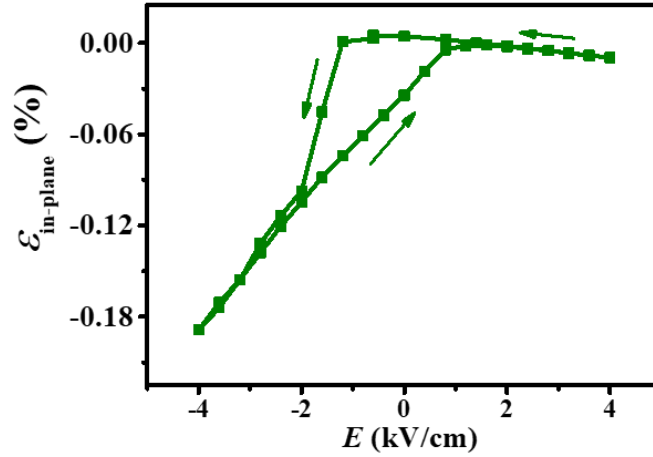

73  
 74 **Supplementary Fig. 6 | In-plane isotropic biaxial strain.** Electric field dependence  
 75 of the in-plane isotropic compressive strain curve is deduced by  
 76  $\varepsilon_{\text{in-plane}} = \varepsilon_{[110]} = \varepsilon_{[-110]} = \nu_{\text{PMN-PT}} \cdot \varepsilon_{[001]}^{\text{PMN-PT}}$  with  $\nu_{\text{PMN-PT}} = -0.5$  (ref. 3), where  $\varepsilon_{[001]}^{\text{PMN-PT}}$  is  
 77 the out-of-plane strain of PMN-PT substrate shown in Fig. 2a.

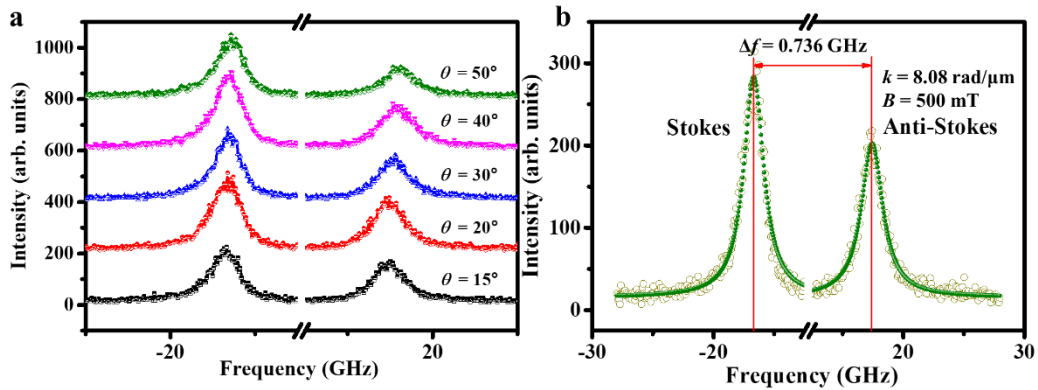

79  
 80 **Supplementary Fig. 7 | BLS spectra. a,** Wave-vector dependence of BLS spectra of

81 our sample. In-plane wave-vector  $k$  is determined by  $k = \frac{4\pi}{\lambda} \sin \theta$ , where  $\lambda$  is the  
 82 wave length of 532 nm,  $\theta$  is the angle between incident light and  $z$  axis. **b**, An example  
 83 of BLS spectrum with  $k = 8.08 \text{ rad}/\mu\text{m}$  ( $\theta = 20^\circ$ ). The open dots are experimental data,  
 84 and the solid dots represent Lorentzian fitting. The frequency shift between Stokes and  
 85 Anti-Stokes is marked by the vertical lines, and  $\Delta f = 0.736 \pm 0.014 \text{ GHz}$ , with the  
 86 standard error obtained from the Lorentzian fitting.  
 87

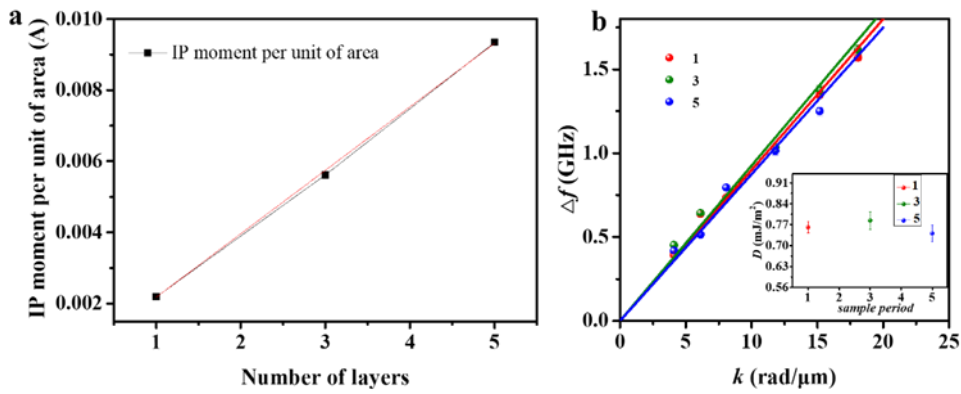

88  
 89 **Supplementary Fig. 8 | In-plane saturation magnetic moments and interfacial**  
 90 **DMI values of Si/Ta(4.7)/[Pt(4)/Co(1.6)/Ta(1.9)] $n$  ( $n$  is 1, 3 and 5). **a**, The in-plane**  
 91 **saturation magnetic moments are proportional to the number of period. As a result, it**  
 92 **can be determined that the magnetic properties of each layer of our sample are**  
 93 **equivalent. **b**, Wave-vector dependence of  $\Delta f$  in Si/Ta(4.7)/[Pt(4)/Co(1.6)/Ta(1.9)] $n$  ( $n$**   
 94 **is 1, 3 and 5) with the interfacial DMI values in the inset with the error bar obtained**  
 95 **from the standard error of Lorentzian fitting. Within the error range, the interfacial DMI**  
 96 **values of the three samples are equivalent. The non-reciprocal effect due to the dipolar**  
 97 **interaction is indeed pronounced in multilayers, however, it can be ignored for our work**  
 98 **because the conditions for it to be effective are not satisfied. The conditions are the**

99 magnetic layers are antiferromagnetically coupled, or ferromagnetically coupled with  
100 the magnetic properties (such as  $M_s$ ) of the magnetic layers different. These conditions  
101 are required for the dipolar interactions in the multilayer film to give rise to the non-  
102 reciprocal effects (this theory proposed by Grunberg<sup>11</sup>). For our work, each magnetic  
103 layer has the same material and thickness, and we applied the in-plane saturation  
104 magnetic field of 5000 Oe during the measurement of BLS, so that the magnetic  
105 moments of the magnetic layers are parallel. In order to check whether the magnetic  
106 properties of each layer are equivalent, we grew Si/Ta(4.7)/[Pt(4)/Co(1.6)/Ta(1.9)]<sub>n</sub>  
107 multilayers with different periods (n is 1, 3 and 5, respectively) by magnetic sputtering.  
108 It is found that their in-plane saturation magnetic moments are proportional to the  
109 number of period as shown in Fig. R9. As a result, it can be determined that the  
110 magnetic properties of each layer of our sample are equivalent. So it can be concluded  
111 that conditions for the dipolar interaction-induced non-reciprocal effect to be effective  
112 are not satisfied for our sample. For these reasons, the non-reciprocal effects due to  
113 dipolar interactions in our sample are negligible. Moreover, even if there is a weak non-  
114 reciprocal effect due to the dipolar interactions, considering that the sample's non-  
115 magnetic layer thickness is 5.9 nm, the non-reciprocal effects due to dipolar interactions  
116 decreases exponentially with the increase of the non-magnetic layer thickness<sup>8</sup>, so these  
117 non-reciprocal effects can be ignored in our work.

118



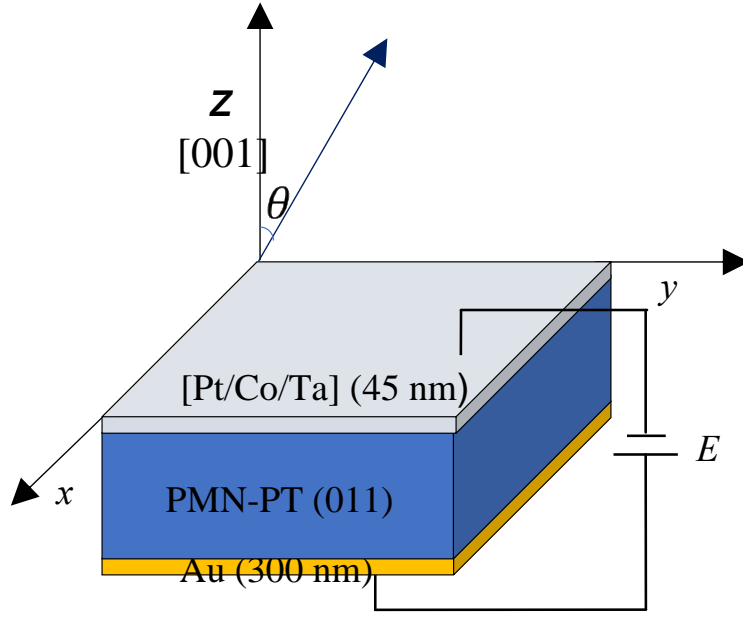

119

120 **Supplementary Fig. 9 | Schematic of experimental configuration for angle-**  
 121 **dependent FMR measurements.**

122 We performed angle-dependent FMR measurements under different electric fields.  
 123 As shown in Supplementary Fig. 9,  $\theta$  is the angle between the applied magnetic field  $H$   
 124 and the out-of-plane ( $z$ ) direction. For each  $\theta$ , a resonance field  $H_r(\theta)$  can be  
 125 determined from the FMR spectrum. The magnetic anisotropy (denoted as  $K_{\text{eff}}$ ) can be  
 126 determined by fitting  $H_r(\theta)$  with the Kittel formula for FMR.

127 Kittel formula for FMR can be written as following:

128

$$f = \frac{\gamma}{2\pi} \sqrt{A_1} \cdot \sqrt{A_2}$$

129

$$A_1 = H_r \cos(\theta - \theta_M) + H_1 \cos^2 \theta_M - H_2 \cos^4 \theta_M$$

130

$$A_2 = H_r \cos(\theta - \theta_M) + H_1 \cos 2\theta_M + H_2 (3\cos^2 \theta_M \sin^2 \theta_M - \cos^4 \theta_M)$$

131

where  $H_1 = 2K_{\text{eff}}/M_S + 4K_2/M_S$  and  $H_2 = 4K_2/M_S$ ,  $\gamma$  is the gyromagnetic

132

ratio given as  $\gamma = g\mu_B/\hbar$ , where  $g$ ,  $\mu_B$  and  $\hbar$  are Lande's  $g$  factor, the Bohr

133

magneton, and Planck's constant, respectively.  $\theta_M$  is the angle between the

134 magnetization and the out-of-plane ( $z$ ) direction. The saturation magnetizations ( $M_S$ )  
 135 for different samples can be deduced from the magnetic hysteresis loops measured by  
 136 MPMS. The three unknown quantities  $K_{\text{eff}}$ ,  $K_2$  and  $g$  can be achieved by fitting  
 137  $H_r$  versus  $\theta$  using the Kittel formula.  
 138

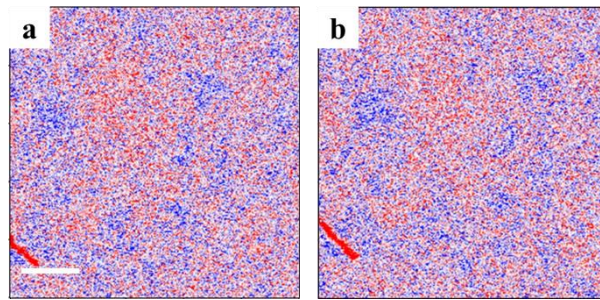

139  
 140 **Supplementary Fig. 10 | Influence of the magnetic tip on sample.** **a**, The first and **b**,  
 141 second MFM scanning images with a scale bar of 1  $\mu\text{m}$ . No skyrmions or other domain  
 142 structures appear after the magnetic tip scanning, which indicates the influence of the  
 143 magnetic tip can be ignored in this case. Moreover, the skyrmions creation is induced  
 144 by the electric field as discussed in the Main Text.

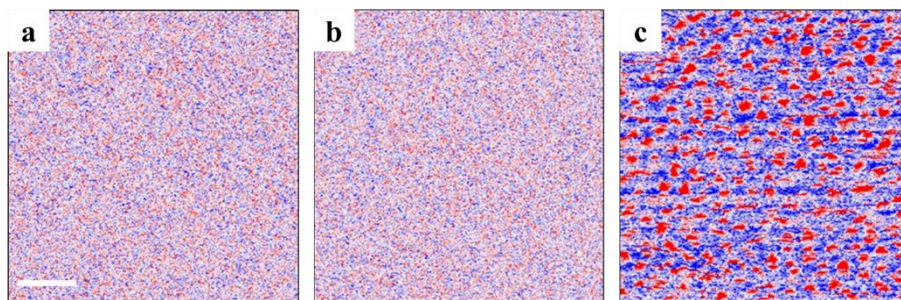

146  
 147 **Supplementary Fig. 11 | Influence of the polarity of electric field.** MFM images at  
 148  $E = -0$  kV/cm (**a**),  $+4$  kV/cm (**b**),  $-4$  kV/cm (**c**), with a scale bar of 1  $\mu\text{m}$ .

149 Initially, the sample has FM single domain and is in negatively polarized remnant

150 state ( $E = -0$  kV/cm) with  $B_{\text{bias}} = 60$  mT, shown in Supplementary Fig. 6a. When  
 151 polarized by +4 kV/cm, there is no obvious change in the MFM image. However, the  
 152 skyrmions are created at -4 kV/cm, as shown in Supplementary Fig. 11c. The skyrmions  
 153 can only be created from the ferromagnetic saturation state when polarized by -4 kV/cm,  
 154 consistent with the limited change under positive electric field in Fig. 3.

155

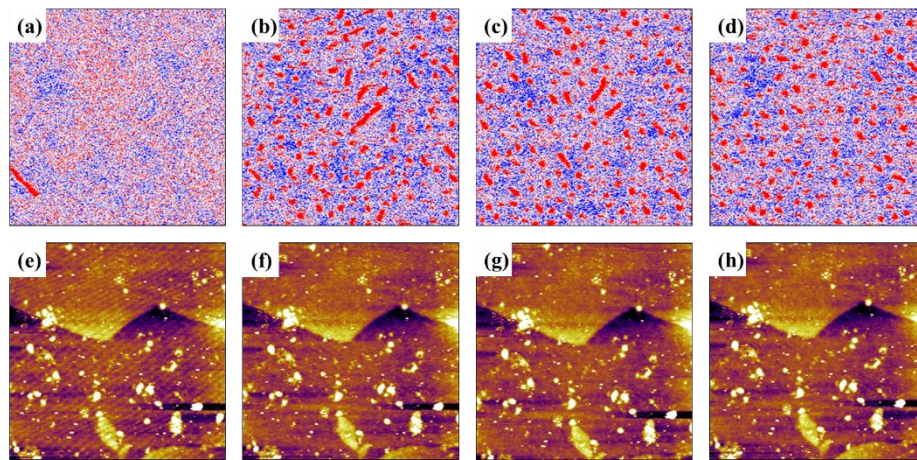

156

157 **Supplementary Fig. 12 | MFM images at  $E = +0$  kV/cm (a), -4 kV/cm (b), -0 kV/cm**  
 158 **(c), +4 kV/cm (d) with  $B_{\text{bias}} = 60$  mT and the corresponding topography images (e)-**  
 159 **(h).**

160 The MFM images were taken in the tapping/lift mode, i.e. the topography and  
 161 magnetic images were obtained at the same time. The topography of the sample is  
 162 obtained using the tapping mode for the first scan, and the magnetic image is obtained  
 163 using the lift mode for the second scan. The magnetic images in Fig. 3 a-d and their  
 164 corresponding topography images are shown in Supplementary Fig. 12. The similar  
 165 topography images indicate that Fig. 3 a-d show the same location on the sample.

166



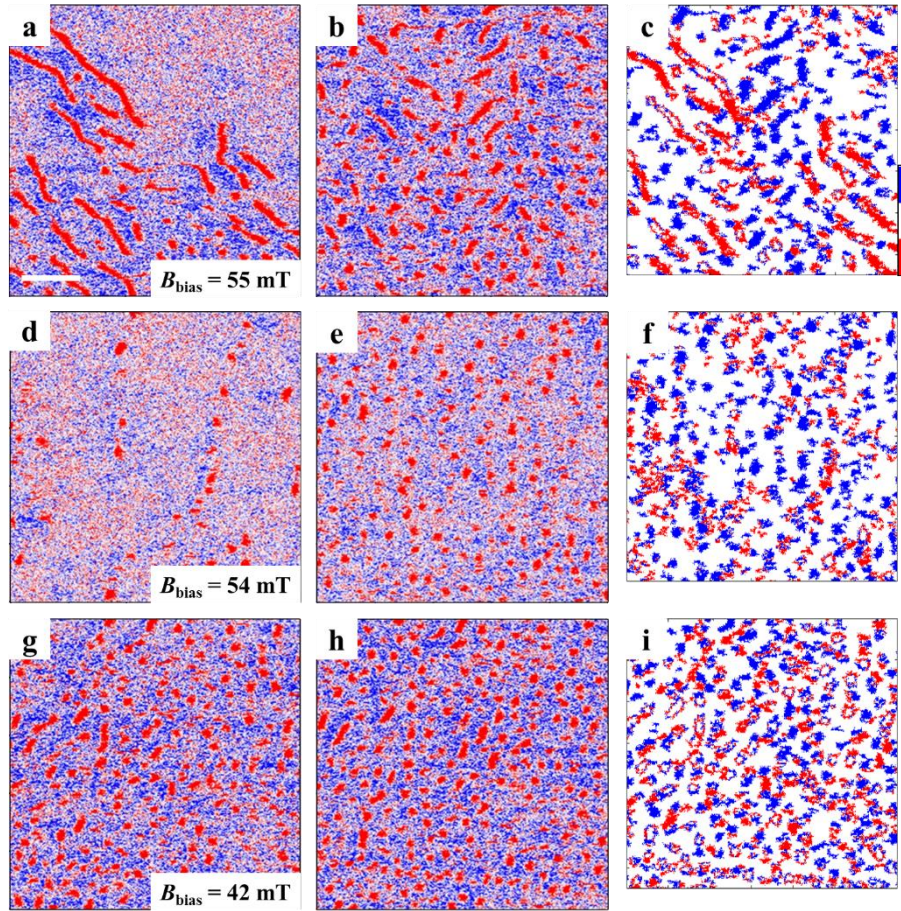

167

168 **Supplementary Fig. 13 | Skyrmion manipulations under different bias magnetic**

169 **fields.** Three areas of the MFM images under different bias magnetic fields: **a, b**,  $B_{\text{bias}}$

170  $= 55$  mT; **d, e**,  $B_{\text{bias}} = 54$  mT; **g, h**,  $B_{\text{bias}} = 42$  mT. The first row for  $E = +0$  kV/cm and

171 the second row for  $E = -4$  kV/cm. **c, f, i**, Point by point map difference between images

172 at  $E = +0$  kV/cm and  $E = -4$  kV/cm, in which the blue contrast shows the appeared

173 domain structure and the red contrast shows the disappeared one after polarized by -4

174 kV/cm. The scale bar is 1  $\mu\text{m}$ .

175 At  $B_{\text{bias}} = 55$  mT, the initial state shows a mixture of skyrmions and stripe domains

176 in Supplementary Fig. 14a. When polarized by -4 kV/cm, more skyrmions are created

177 from the saturation ferromagnetic background and the stripe domains also transform to

178 skyrmions, which can also be indicated by the blue contrast and red stripe contrast in

179 map difference Supplementary Fig. 13c.

180 At  $B_{\text{bias}} = 54$  mT, a few skyrmions are shown in Supplementary Fig. 13d and more  
181 skyrmions can be created by  $-4$  kV/cm. The map difference, Supplementary Fig. 13f,  
182 shows more blue contrast than red ones.

183 At  $B_{\text{bias}} = 42$  mT, the initial state shows skyrmions state with a large density, and  
184 little new skyrmions are created by  $-4$  kV/cm. The blue and red contrasts in map  
185 difference, Supplementary Fig. 13i, are mainly due to the misalignment of the  
186 morphology.

187

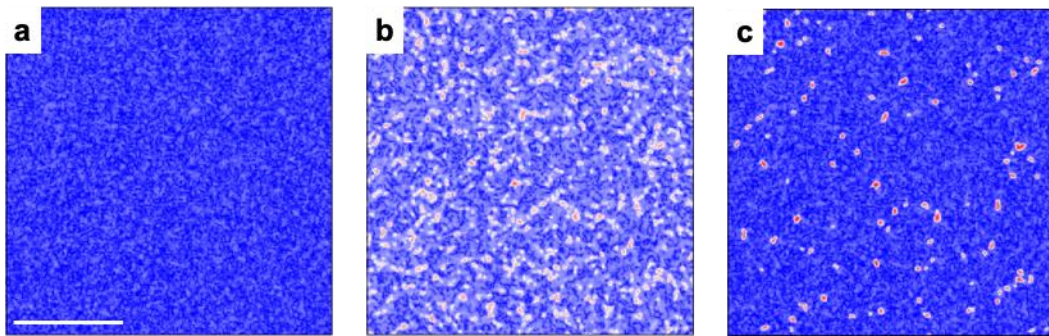

188

189 **Supplementary Figure 14 | Retainment of skyrmions assuming strain is zero and**

190 **D remains unchanged. a,** Magnetization distribution at  $E = +0$  kV/cm relaxed from an

191 initially uniform [001] distribution under zero strains and  $D = 0.772$  mJ/m<sup>2</sup>. **b,** Multiple

192 isolated skyrmions appeared after applying strain  $\varepsilon_{[1-10]} = \varepsilon_{[110]} = -0.189\%$  and  $D =$

193  $0.585$  mJ/m<sup>2</sup> at  $E = -4$  kV/cm. **c,** Retainment of skyrmions at zero strain with  $D = 0.585$

194 mJ/m<sup>2</sup> unchanged. The scale bar is  $1 \mu\text{m}$ .

195 In the Main Text, the skyrmions were created by in-plane biaxial compressive

196 strain at  $E = -4$  kV/cm (Fig. 3f), and most of the skyrmions can be retained after

197 removing electric field ( $E = -0$  kV/cm) (Fig. 3g). Although there was remanent strain

198 of  $\varepsilon_{[1-10]} = \varepsilon_{[110]} = -0.034\%$  and an enhancement of  $D$  from  $0.585 \text{ mJ/m}^2$  to  $0.685$   
 199  $\text{mJ/m}^2$  at  $E = -0 \text{ kV/cm}$ , neither this remanent strain nor the enhanced  $D$  is a prerequisite  
 200 for the retainment of skyrmions. As shown in Supplementary Fig. 14c, a considerable  
 201 amount of skyrmions are still present even when strain is set as zero and  $D$  remains to  
 202 be  $0.585 \text{ mJ/m}^2$ .

203

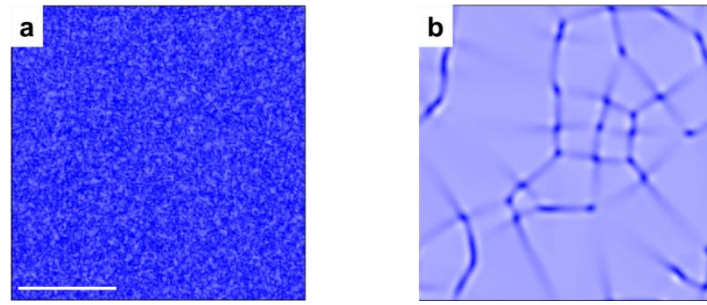

204

205 **Supplementary Fig. 15 | Magnetization switching in single-crystalline model.**

206 Magnetization distribution at **a**, initial state without strain, and **b**, equilibrium state  
 207 after applying strain  $\varepsilon_{[1-10]} = \varepsilon_{[110]} = -0.189\%$ . The scale bar is  $1 \mu\text{m}$ .

208 Remarkably, we show that if removing all the spatial variance of the magnetic  
 209 parameters including the axis of uniaxial magnetocrystalline anisotropy,  
 210 magnetocrystalline anisotropy constant and the interfacial DMI strength from the model  
 211 set up (see Methods section), which is in effect describing a single-crystalline magnetic  
 212 system, the initially nearly  $[001]$  magnetization in Supplementary Fig. 15a will be  
 213 switched to film plane with an average  $\langle m_z \rangle = 0.54$  upon applying the same amount  
 214 of strains in Fig. 3f in the Main Text, where some antivortex cores instead of skyrmions  
 215 can be found (Supplementary Fig. 15b). Therefore, we introduce the polycrystalline  
 216 model with a finite grain size to simulate the skyrmion creation process.



217

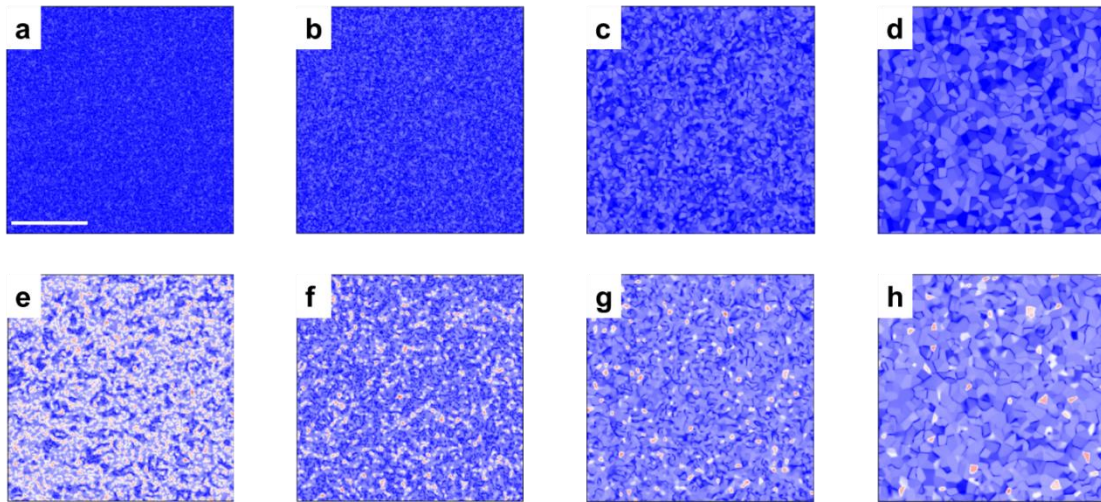

218

219 **Supplementary Fig. 16 | Effect of grain size. a-d**, initial state of magnetization  
220 distribution relaxed from a uniform distribution along [001] under zero strains, with  
221 grain size of 10 nm, 20 nm 50 nm and 100 nm. **e-h**, Skyrmions appear after applying  
222 strain  $\varepsilon_{[1-10]} = \varepsilon_{[110]} = -0.189\%$  , with grain size of 10 nm, 20 nm 50 nm and 100 nm.  
223 The model set up is identical to that described in Methods section of the Main Text  
224 expect the grain size. The scale bar is 1  $\mu\text{m}$ .

225 Supplementary Fig. 16 shows the skyrmions creation in the polycrystalline  
226 magnetic layer with different grain sizes, as can be seen, the use of larger grain size  
227 yields larger but fewer skyrmions. For the results shown in Figure 3, a mean grain size  
228 of 20 nm is used, which is also used in other work.<sup>4</sup>

229

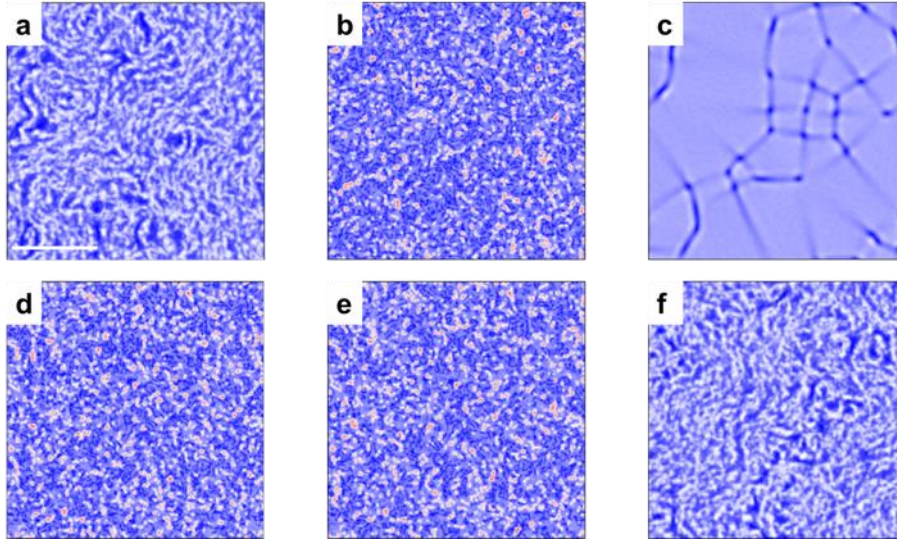

230

231 **Supplementary Fig. 17 | Necessity and sufficiency of spatially varied parameters**

232 **for skyrmion creation.** The magnetization distributions after applying strain

233  $\varepsilon_{[1-10]} = \varepsilon_{[110]} = -0.189\%$ , starting from same initial state, with **a**, only  $K_U$  spatially

234 varied; **b**, only the axis of uniaxial magnetocrystalline anisotropy spatially varied; **c**,

235 only  $D$  spatially varied; **d**, both  $K_U$  and the axis of uniaxial magnetocrystalline

236 anisotropy spatially varied; **e**, both  $D$  and the axis of uniaxial magnetocrystalline

237 anisotropy spatially varied; **f**, both  $K_U$  and  $D$  spatially varied as described in the Method.

238 The scale bar is 1  $\mu\text{m}$ .

239 In Supplementary Fig. 17, we performed six independent groups of simulations

240 for the skyrmion creation. In Supplementary Fig. 17a-c, the three parameters ( $K_U$ , the

241 axis of uniaxial magnetocrystalline anisotropy, and  $D$ ) are varied independently (when

242 one parameter is varied, the other two are set to be spatially uniform), and in

243 Supplementary Fig. 17d-f, two of the parameters ( $K_U$ , the axis of uniaxial

244 magnetocrystalline anisotropy, and  $D$ ) are varied simultaneously, the other one is set to

245 be spatially uniform. It is found that the spatial variation in the axis of uniaxial

246 magnetocrystalline anisotropy is both necessary and sufficient for strain-mediated



247 skyrmion creation.

248

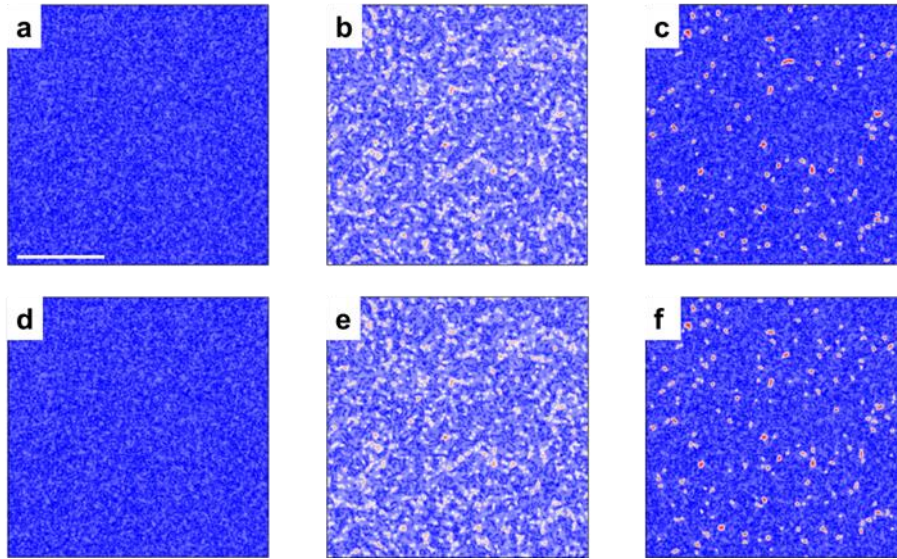

249

250 **Supplementary Fig. 18 | Scaling test for computational cell size.** Magnetization  
251 distribution at initial state with  $E = +0$  kV/cm, after applying strain  
252  $\varepsilon_{[1-10]} = \varepsilon_{[110]} = -0.189\%$  with  $E = -4$  kV/cm and after reducing the strain to  
253  $\varepsilon_{[1-10]} = \varepsilon_{[110]} = -0.034\%$  with  $E = -0$  kV/cm, in a  $3 \mu\text{m} \times 3 \mu\text{m}$  simulation system, **a-c**,  
254 with cell size of 3 nm, and **d-f**, with cell size of 1.5 nm. The set-up is identical to that  
255 described in Method section. The scale bar is  $1 \mu\text{m}$ .

256 A scaling test was performed to ensure the size of the discretized computational  
257 cells is small enough, as shown in Supplementary Fig. 18. For the simulation results  
258 shown in the first row,  $\Delta x = \Delta y = 3$  nm and  $n_x = n_y = 1000$  are used, and for simulation  
259 results shown in the second line,  $\Delta x = \Delta y = 1.5$  nm and  $n_x = n_y = 2000$  are used. As can  
260 be seen in Supplementary Fig. 18, the simulations with different cell size yield very  
261 similar spatial distribution of the magnetization. Considering longer computation time  
262 for more discretized computational cells, we set  $\Delta x = \Delta y = 3$  nm and  $n_x = n_y = 1000$  in

263 the simulations for Fig. 3.

264 In addition, when simulating strain-mediated deformation and annihilation of one  
265 single skyrmion (Fig. 4-5), we adopt the single-crystalline model with  $\Delta x = \Delta y = 0.5$   
266 nm for higher precision and  $n_x = n_y = 600$  for faster computation.

267

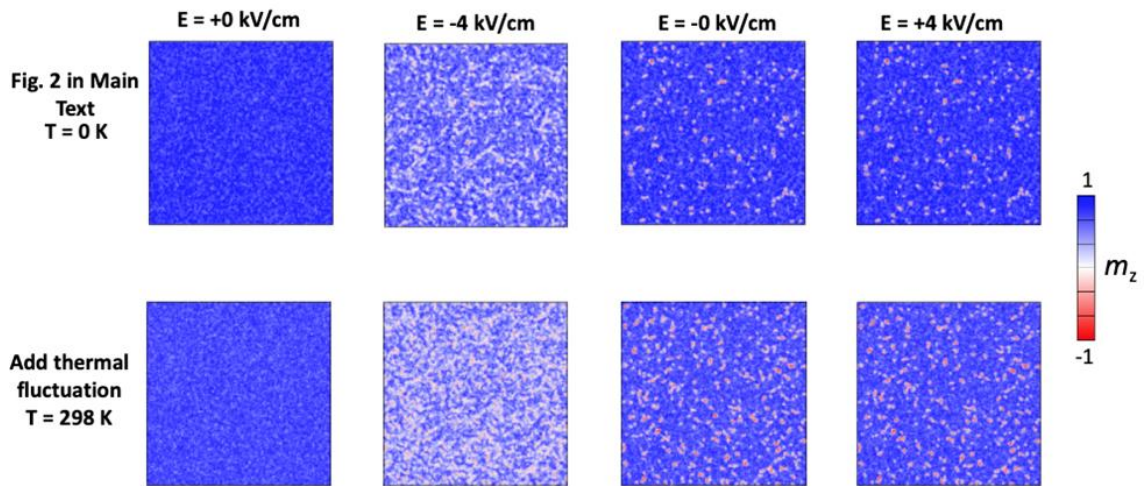

268

269 **Supplementary Fig. 19 | Micromagnetic simulation results with/without thermal**  
270 **fluctuation.**

271 In the main paper, we set  $T = 0$  K (that is, excluding the thermal fluctuation) for  
272 performing a clean free energy analysis on the strain-mediated skyrmion creation. We  
273 checked the influence of  $\mathbf{B}_{\text{therm}}$  ( $T = 298$  K) on the strain-mediated skyrmion creation  
274 process. The Supplementary Fig. 19 compares the results under  $T = 0$  K (the first row,  
275 corresponding to Fig. 3e-h in the main paper) and  $T = 298$  K, respectively. All other  
276 settings are kept the same. As can be seen, the overall behavior of the strain-mediated  
277 creation of skyrmions under  $T = 298$  K is similar to both the simulation results obtained  
278 under  $T = 0$  K, hence being similar to experimental observations (see Fig. 3a-d in the  
279 main paper). Regarding the details of the switching process, two observations are noted

280 below. First, the addition of  $\mathbf{B}_{\text{therm}}$  (T=298 K) introduces white noise into the  
 281 magnetization distribution. Second, compared to the case  $\mathbf{B}_{\text{therm}} = 0$  (T = 0 K), there are  
 282 more skyrmions created when in-plane compressive strain is applied with  $E = -4$  kV/cm,  
 283 and more skyrmions retained when the electric field is turned off ( $E = -0$  kV/cm).  
 284

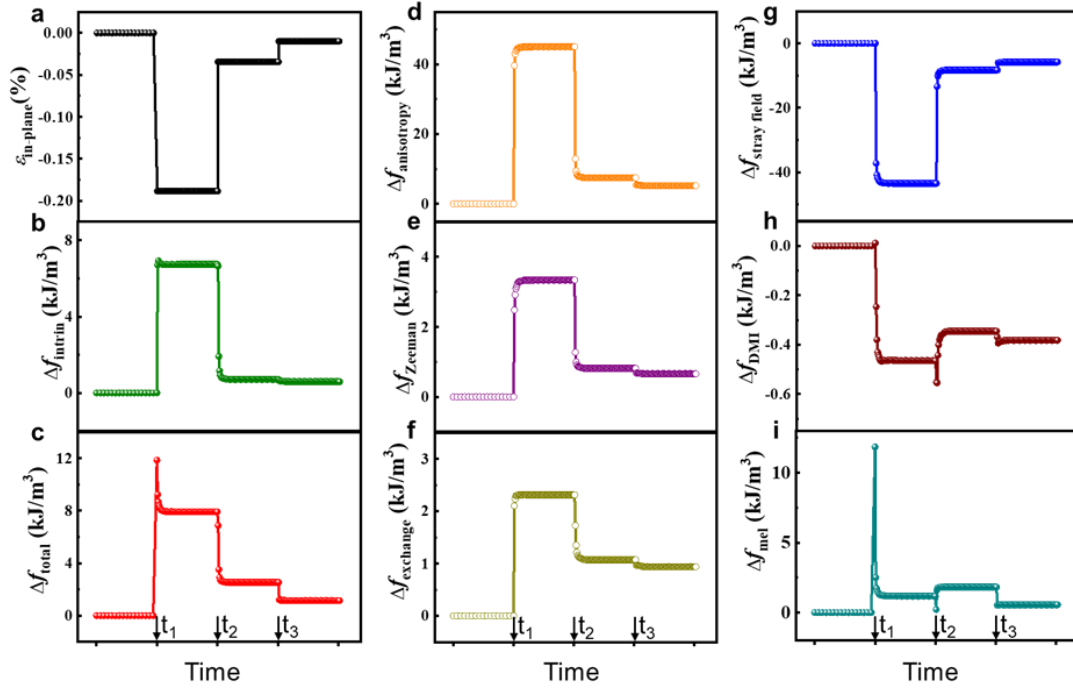

285  
 286 **Supplementary Fig. 20 | Evolution of the applied in-plane biaxial compressive**  
 287 **strain and the energy densities in the process from Fig. 3e to Fig. 3h.** The evolution  
 288 of **a**, in-plane biaxial compressive strain, **b-i**, change of the intrinsic free energy density,  
 289 total free energy density, anisotropy energy density, Zeeman energy density, exchange  
 290 energy density, stray field energy density, magnetoelastic energy density and DMI  
 291 energy density. The values of energies before strain is applied at  $t = t_1$  are taken as  
 292 reference zero point.

293 As shown in Supplementary Fig. 20, when the strain  $\varepsilon_{[1-10]} = \varepsilon_{[110]} = -0.189\%$  is

294 applied at  $t = t_1$  with electric field  $E = -4$  kV/cm, the magnetoelastic energy density  
295  $\Delta f_{\text{mel}}$  and total energy density  $\Delta f_{\text{tot}}$  increase steeply by about 12 kJ/m<sup>3</sup>. Then, the  
296 decrease in  $\Delta f_{\text{mel}}$  and increase in  $\Delta f_{\text{intrinsic}} = \Delta f_{\text{tot}} - \Delta f_{\text{mel}}$  follow immediately after the  
297 process of skyrmion creation starts, in this process, the total energy density decreases  
298 by about 4 kJ/m<sup>3</sup> because the magnitude of the decrease in  $\Delta f_{\text{mel}}$  is larger than the  
299 increase in  $\Delta f_{\text{intrinsic}}$ , therefore, the decrease in  $\Delta f_{\text{mel}}$  is a driving force of the skyrmions  
300 creation. More specifically, among all contributions to  $\Delta f_{\text{intrinsic}}$ , DMI energy density  
301  $\Delta f_{\text{DMI}}$  and magnetostatic stray field energy density  $\Delta f_{\text{stray field}}$  also decrease, which drive  
302 the creation of skyrmions along with the release of the  $\Delta f_{\text{mel}}$ .

303

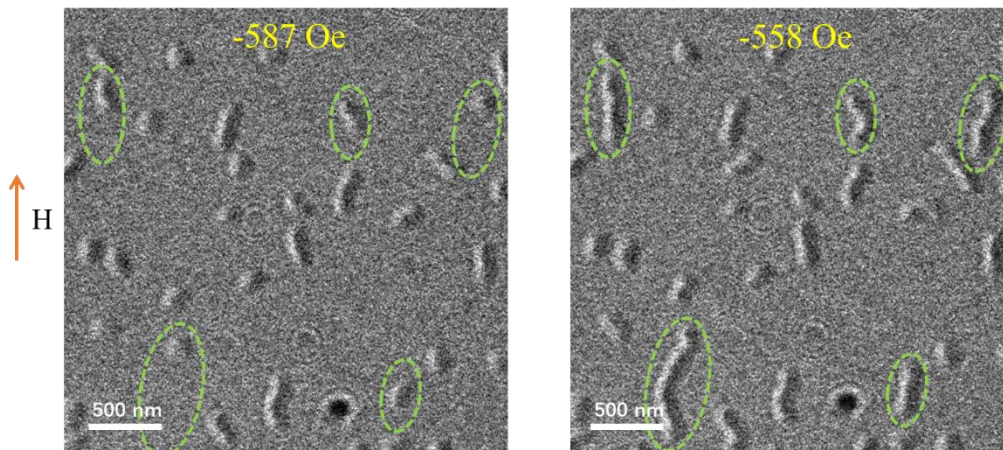

304

305 **Supplementary Fig. 21 | In-situ L-TEM observation. The images were taken at a**  
306 **tilt angle of  $\alpha=20.06^\circ$  and  $\beta=20.39^\circ$ , and the arrow indicates the in-plane magnetic**  
307 **field direction.**

308 As demonstrated by Senfu Zhang et al, observation of the asymmetric domain  
309 expansion under an in-plane magnetic field by L-TEM can be used to get the chirality  
310 of Néel-type skyrmions<sup>4</sup>. Therefore, we observed asymmetric domain expansion under  
311 an in-plane magnetic field by L-TEM. For Pt/Co/Ta multilayers, Senfu Zhang et al

312 showed that “on decreasing the magnetic field, individual skyrmions appear to  
 313 subsequently evolve into snake-like structures growing in the direction opposite to the  
 314 in-plane magnetic field”, which illustrate that these skyrmions have left-handed  
 315 chirality<sup>4</sup>. As shown in Supplementary Fig. 21, we indicated the changes in the images  
 316 with the green dashed ellipses. The directions that the snake-like structures preferred to  
 317 grow along are also opposite to that of the in-plane field in our work, consistent with  
 318 that of Senfu Zhang et al’s work<sup>4</sup>. This proves that the skyrmions in our Pt/Co/Ta  
 319 multilayers actually have left-handed chirality, which has also been demonstrated by  
 320 the previous reports<sup>9, 10</sup>.

321

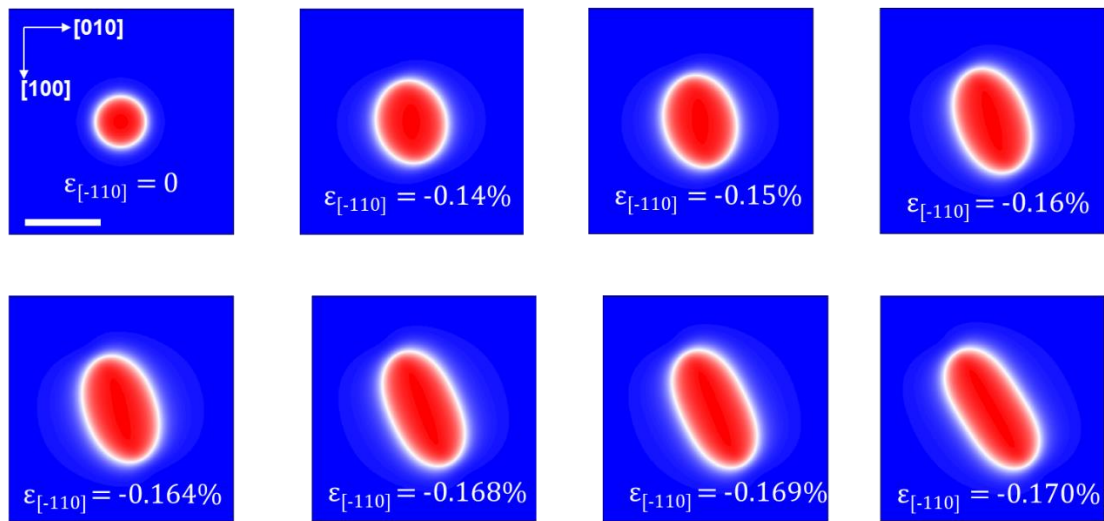

323 **Supplementary Fig. 22 | A series of skyrmion morphology under different in-plane**  
 324 **uniaxial compressive strain.** The scale bar is 100 nm.

325 Although we use the in-plane isotropic strain assumption in Fig. 2, the local strain  
 326 can be anisotropic due to the different FE domain switching<sup>5,6</sup>. The simulation result  
 327 shows skyrmion deformation caused by the in-plane uniaxial compressive strain.

328



329 **References**

- 330 1. Liu, H. et al. Critical role of monoclinic polarization rotation in high-performance  
331 perovskite piezoelectric materials. *Phys. Rev. Lett.* **119**, 017601 (2017).
- 332 2. Fu, H. & Cohen, R. E. Polarization rotation mechanism for ultrahigh  
333 electromechanical response in single-crystal piezoelectrics. *Nature* **403**, 281-283  
334 (2000).
- 335 3. Chen, Q. et al. Electric-field control of phase separation and memory effect in  
336  $\text{Pr}_{0.6}\text{Ca}_{0.4}\text{MnO}_3/\text{Pb}(\text{Mg}_{1/3}\text{Nb}_{2/3})_{0.7}\text{Ti}_{0.3}\text{O}_3$  heterostructures. *Appl. Phys. Lett.* **98**,  
337 172507 (2011).
- 338 4. Zhang, S., Zhang, J., Wen, Y., Chudnovsky, E. M. & Zhang, X. Determination of  
339 chirality and density control of Néel-type skyrmions with in-plane magnetic field.  
340 *Commun. Phys.* **1**, 36 (2018).
- 341 5. Ba, Y. et al. Spatially resolved electric-field manipulation of magnetism for CoFeB  
342 mesoscopic discs on ferroelectrics. *Adv. Funct. Mater.* **28**, 1706448 (2018).
- 343 6. Ghidini, M. et al. Shear-strain-mediated magnetoelectric effects revealed by  
344 imaging. *Nat. Mater.* **18**, 840-845 (2019).
- 345 7. Ma, J. et al. Controllable conductive readout in self-assembled, topologically  
346 confined ferroelectric domain walls. *Nat. Nanotechnol.* **13**, 947-952 (2018).
- 347 8. Gallardo, R. A. et al. Reconfigurable Spin-Wave Nonreciprocity Induced by  
348 Dipolar Interaction in a Coupled Ferromagnetic Bilayer. *Phys. Rev. Appl.* **12**,  
349 034012 (2019).
- 350 9. Saha, S. et al. Formation of Néel-type skyrmions in an antidot lattice with

- 351 perpendicular magnetic anisotropy. *Phys. Rev. B* **100**, 144435 (2019).
- 352 10. Woo, S. et al. Observation of room-temperature magnetic skyrmions and their  
353 current-driven dynamics in ultrathin metallic ferromagnets. *Nat. Mater.* **15**, 501–  
354 506 (2016).
- 355 11. Grunberg, P. et al. Magnetostatic spin-wave modes of a heterogeneous  
356 ferromagnetic double layer. *J. Appl. Phys.* **52**, 6824 (1981).
